# Supplementary material for: Discovering potential inhibitors of the YEATS domain of YEATS2 through virtual screening, molecular optimization and molecular dynamics simulations
Source: Royal Society of Chemistry journal article supplement (doi:10.1039/d3nj03738j), 2023-01-01

## Supplementary Material

### **Discovering potential inhibitors of YEATS domain of YEATS2 through virtual screening, molecular optimization and molecular dynamics simulation**

Xiaoyan Wang<sup>1</sup>, Guang hui Cheng<sup>2</sup>, Jingjie Zhao<sup>3</sup>, Ping Gao<sup>4</sup>, Haiting Mao<sup>3</sup>, Chao Yuan<sup>3\*</sup>, Jian Zhang<sup>2\*</sup>

<sup>1</sup> Department of Clinical Laboratory, Shandong Provincial Hospital Affiliated to Shandong First Medical University, 250021 Jinan, Shandong, People's Republic of China

<sup>2</sup> Institute of Medical Sciences, The Second Hospital, Cheeloo College of Medicine, Shandong University, 250033 Jinan, Shandong, People's Republic of China

<sup>3</sup> Department of Clinical Laboratory, The Second Hospital, Cheeloo College of Medicine, Shandong University, 250033 Jinan, Shandong, People's Republic of China

<sup>4</sup> Department of Pharmacy, Shandong Provincial Hospital Affiliated to Shandong First Medical University, Jinan, Shandong 250021, China

\*Corresponding author: Chao Yuan, 247 Beiyuan Street, 250033 Jinan, Shandong, People's Republic of China

Email: cyuan\_1987@163.com

Jian Zhang, 247 Beiyuan Street, 250033 Jinan, Shandong, People's Republic of China

Email: 469205425@qq.com

## **Table of Contents**

- I. Molecules with high affinity and appropriate binding position to the YEATS2 YEATS domain in ZINC Natural Products, Enamine Advanced and Enamine HTS.
- II. All small molecules (657 compounds) obtained by three rounds of molecular optimization.
- III. The structure and docking parameters of selected molecular from molecular optimization.
- IV. Figures of molecular dynamics simulation studies

**I. Molecules with high affinity and appropriate binding position to the YEATS2 YEATS domain in ZINC Natural Products, Enamine Advanced and Enamine HTS.**

**Table S1.** Molecules with high affinity and appropriate binding position to the YEATS2 YEATS domain in ZINC Natural Products.

| ZINC Natural Products (127695 Compounds, 2016 October 1) |              |                     |                                                                                      |
|----------------------------------------------------------|--------------|---------------------|--------------------------------------------------------------------------------------|
| NO.                                                      | Compound     | Affinity (kcal/mol) | Structure                                                                            |
| 1                                                        | ZINC35361861 | -9.7                | 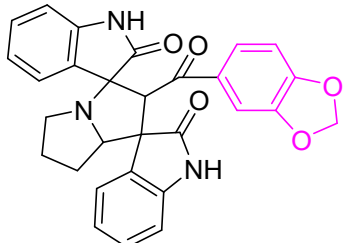   |
| 2                                                        | ZINC61997740 | -9.2                |   |
| 3                                                        | ZINC04258869 | -9.1                |  |
| 4                                                        | ZINC08300421 | -9.1                |  |

|   |              |      |                                                                                      |
|---|--------------|------|--------------------------------------------------------------------------------------|
| 5 | ZINC20503705 | -9.0 | 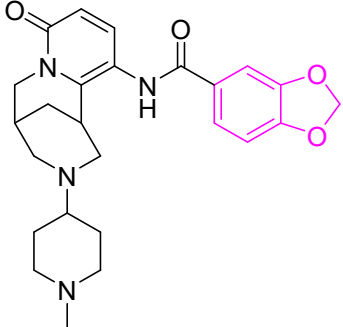   |
| 6 | ZINC09183645 | -8.9 |    |
| 7 | 21799        | -8.8 |   |
| 8 | ZINC08791373 | -8.8 |  |
| 9 | ZINC09306874 | -8.8 |  |

|    |              |      |                                                                                      |
|----|--------------|------|--------------------------------------------------------------------------------------|
| 10 | ZINC85889186 | -8.6 | 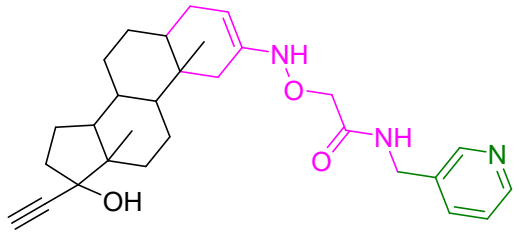   |
| 11 | 19523        | -8.5 |    |
| 12 | ZINC08791689 | -8.5 |    |
| 13 | ZINC03846561 | -8.5 |  |
| 14 | ZINC12296341 | -8.5 |  |
| 15 | ZINC08296611 | -8.5 |  |

**Table S2.** Molecules with high affinity and appropriate binding position to the YEATS2 YEATS domain in Enamine Advanced.

Enamine Advanced (448388 compounds, 2020 May)

| NO. | Compound    | Affinity<br>(kcal/mol) | Structure                                                                            |
|-----|-------------|------------------------|--------------------------------------------------------------------------------------|
| 1   | Z2118684250 | -9.1                   | 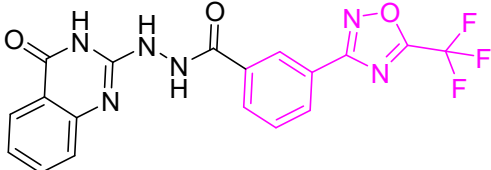   |
| 2   | Z2098109826 | -9.0                   |    |
| 3   | Z1148211073 | -8.9                   |   |
| 4   | Z1919888977 | -8.9                   |  |
| 5   | Z1323896259 | -8.8                   |  |
| 6   | Z2958154393 | -8.8                   |  |
| 7   | Z3021380753 | -8.8                   |  |

|    |             |      |                                                                                      |
|----|-------------|------|--------------------------------------------------------------------------------------|
| 8  | Z3711050398 | -8.8 | 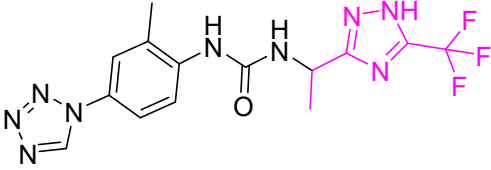   |
| 9  | Z1258908930 | -8.7 |    |
| 10 | Z1385327618 | -8.7 |   |
| 11 | Z1452691933 | -8.7 |   |
| 12 | Z1967764963 | -8.7 |  |
| 13 | Z3905360135 | -8.7 |  |
| 14 | Z1551070239 | -8.6 |  |
| 15 | Z1849427362 | -8.6 |  |

|    |             |      |                                                                                      |
|----|-------------|------|--------------------------------------------------------------------------------------|
| 16 | Z1873289090 | -8.6 | 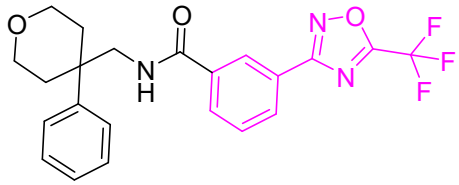   |
| 17 | Z1873385828 | -8.6 |    |
| 18 | Z1873389144 | -8.6 |    |
| 19 | Z2085880001 | -8.6 |   |
| 20 | Z2232498249 | -8.6 |  |
| 21 | Z28082318   | -8.6 |  |
| 22 | Z3713600506 | -8.6 |  |



|    |             |      |                                                                                      |
|----|-------------|------|--------------------------------------------------------------------------------------|
| 23 | Z3905360136 | -8.6 | 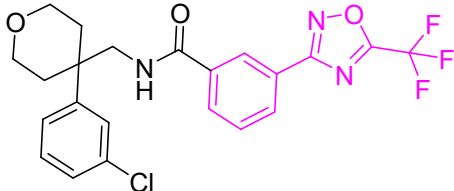   |
| 24 | Z3905360141 | -8.6 |    |
| 25 | Z1132217352 | -8.5 |    |
| 26 | Z1187372633 | -8.5 |   |
| 27 | Z1262386157 | -8.5 |  |
| 28 | Z1528581457 | -8.5 |  |
| 29 | Z2233592836 | -8.5 |  |
| 30 | Z2346955514 | -8.5 |  |

|    |             |      |                                                                                      |
|----|-------------|------|--------------------------------------------------------------------------------------|
| 31 | Z2386291968 | -8.5 | 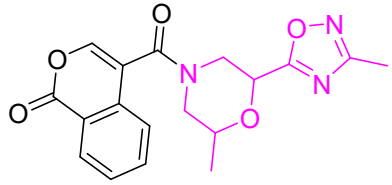   |
| 32 | Z2386293633 | -8.5 |    |
| 33 | Z2608066998 | -8.5 |    |
| 34 | Z2956873977 | -8.5 |    |
| 35 | Z3905360129 | -8.5 |  |
| 36 | Z3905360137 | -8.5 |  |
| 37 | Z3905360140 | -8.5 |  |
| 38 | Z804227812  | -8.5 |  |

|    |             |      |                                                                                    |
|----|-------------|------|------------------------------------------------------------------------------------|
| 39 | Z968681000  | -8.5 | 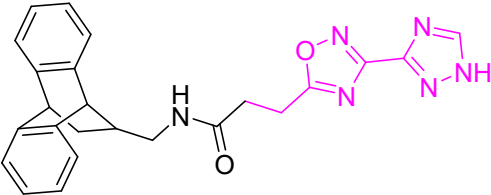 |
| 40 | Z1434124373 | -8.5 |  |
| 41 | Z2956873977 | -8.5 |  |

**Table S3.** Molecules with high affinity and appropriate binding position to the YEATS2 YEATS domain in Enamine HTS.

| Enamine HTS (1756280 compounds, 2020 May) |            |                     |                                                                                      |
|-------------------------------------------|------------|---------------------|--------------------------------------------------------------------------------------|
| NO.                                       | Compound   | Affinity (kcal/mol) | Structure                                                                            |
| 1                                         | Z44612196  | -9.7                | 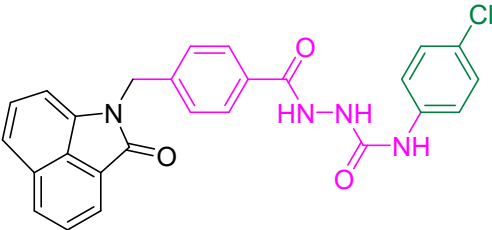 |
| 2                                         | Z927561814 | -9.5                |  |
| 3                                         | Z255749124 | -9.2                |  |

|    |             |      |                                                                                      |
|----|-------------|------|--------------------------------------------------------------------------------------|
| 4  | Z229478524  | -9.1 | 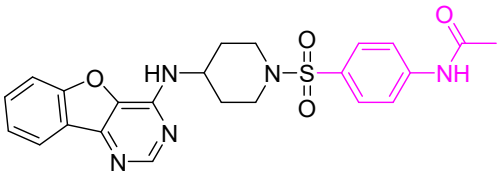   |
| 5  | Z1303141295 | -9.0 |    |
| 6  | Z198245876  | -9.0 |    |
| 7  | Z27057035   | -9.0 |    |
| 8  | Z31192849   | -9.0 |   |
| 9  | Z44848962   | -9.0 |  |
| 10 | Z236066456  | -8.9 |  |

|    |           |      |                                                                                      |
|----|-----------|------|--------------------------------------------------------------------------------------|
| 11 | Z29902054 | -8.9 | 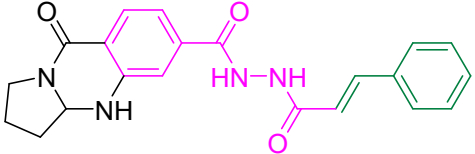   |
| 12 | Z31116504 | -8.9 |    |
| 13 | Z31192848 | -8.9 |    |
| 14 | Z31285773 | -8.9 |   |
| 15 | Z45558953 | -8.9 |  |
| 16 | Z54322378 | -8.9 |  |
| 17 | Z56851851 | -8.9 |  |
| 18 | Z16244153 | -8.8 |  |

|    |             |      |  |
|----|-------------|------|--|
| 19 | Z286373756  | -8.8 |  |
| 20 | Z29109770   | -8.8 |  |
| 21 | Z31089631   | -8.8 |  |
| 22 | Z369415780  | -8.8 |  |
| 23 | Z92503894   | -8.8 |  |
| 24 | Z1359473641 | -8.7 |  |
| 25 | Z193192822  | -8.7 |  |

|    |             |      |                                                                                      |
|----|-------------|------|--------------------------------------------------------------------------------------|
| 26 | Z280678030  | -8.7 | 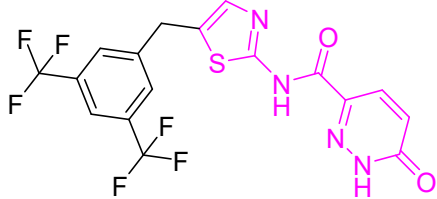   |
| 27 | Z30470231   | -8.7 |    |
| 28 | Z31270549   | -8.7 |    |
| 29 | Z86587006   | -8.7 |   |
| 30 | Z1014768846 | -8.6 |  |
| 31 | Z1175891072 | -8.6 |  |
| 32 | Z1246243919 | -8.6 |  |

|    |             |      |                                                                                      |
|----|-------------|------|--------------------------------------------------------------------------------------|
| 33 | Z1257219130 | -8.6 | 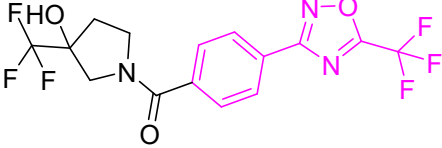   |
| 34 | Z131403708  | -8.6 |    |
| 35 | Z1456429938 | -8.6 |    |
| 36 | Z251327578  | -8.6 |    |
| 37 | Z283926688  | -8.6 |  |
| 38 | Z30471455   | -8.6 |  |
| 39 | Z31270545   | -8.6 |  |



|    |           |      |                                                                                      |
|----|-----------|------|--------------------------------------------------------------------------------------|
| 40 | Z31272661 | -8.6 | 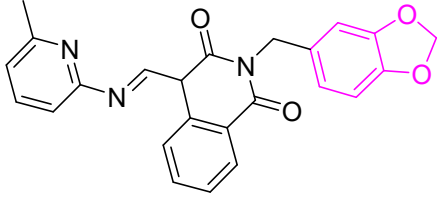   |
| 41 | Z31274597 | -8.6 |    |
| 42 | Z31274861 | -8.6 |    |
| 43 | Z31274927 | -8.6 |   |
| 44 | Z31275103 | -8.6 |  |
| 45 | Z31275675 | -8.6 |  |

## II. All small molecules (657 compounds) obtained by three rounds of molecular optimization.

**Table S4.** The small molecules (288 compounds) obtained by the first round of molecular optimization.

| No. | Structure | No. | Structure |
|-----|-----------|-----|-----------|
|-----|-----------|-----|-----------|

|    |                                                                                     |    |                                                                                       |
|----|-------------------------------------------------------------------------------------|----|---------------------------------------------------------------------------------------|
| 1  | 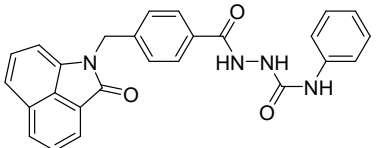   | 2  |    |
| 3  |    | 4  |    |
| 5  |    | 6  |    |
| 7  |    | 8  |    |
| 9  |  | 10 |  |
| 11 |  | 12 |  |
| 13 |  | 14 |  |
| 15 |  | 16 |  |

|    |  |    |  |
|----|--|----|--|
| 17 |  | 18 |  |
| 19 |  | 20 |  |
| 21 |  | 22 |  |
| 23 |  | 24 |  |
| 25 |  | 26 |  |
| 27 |  | 28 |  |
| 29 |  | 30 |  |
| 31 |  | 32 |  |
| 33 |  | 34 |  |

|    |                                                                                     |    |                                                                                       |
|----|-------------------------------------------------------------------------------------|----|---------------------------------------------------------------------------------------|
| 35 | 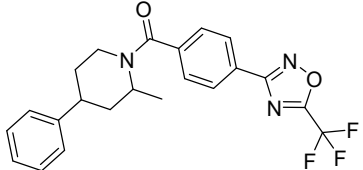   | 36 |     |
| 37 |    | 38 |    |
| 39 |    | 40 |     |
| 41 |    | 42 |     |
| 43 |   | 44 |   |
| 45 |  | 46 |  |
| 47 |  | 48 |  |
| 49 |  | 50 |  |

|    |                                                                                     |    |                                                                                      |
|----|-------------------------------------------------------------------------------------|----|--------------------------------------------------------------------------------------|
| 51 | 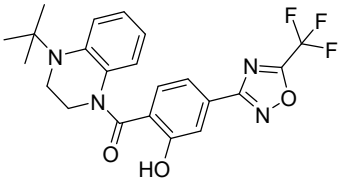   | 52 |   |
| 53 |    | 54 |    |
| 55 |    | 56 |    |
| 57 |    | 58 |    |
| 59 |    | 60 |    |
| 61 |   | 62 |   |
| 63 |  | 64 |  |
| 65 |  | 66 |  |
| 67 |  | 68 |  |
| 69 |  | 70 |  |
| 71 |  | 72 |  |
| 73 |  | 74 |  |

|    |  |    |  |
|----|--|----|--|
| 75 |  | 76 |  |
| 77 |  | 78 |  |
| 79 |  | 80 |  |
| 81 |  | 82 |  |
| 83 |  | 84 |  |
| 85 |  | 86 |  |
| 87 |  | 88 |  |
| 89 |  | 90 |  |
| 91 |  | 92 |  |
| 93 |  | 94 |  |

|     |                                                                                     |     |                                                                                      |
|-----|-------------------------------------------------------------------------------------|-----|--------------------------------------------------------------------------------------|
| 95  | 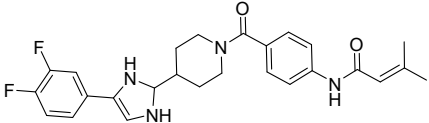   | 96  |    |
| 97  |    | 98  |    |
| 99  |    | 100 |    |
| 101 |    | 102 |    |
| 103 |   | 104 |   |
| 105 |  | 106 |  |
| 107 |  | 108 |  |
| 109 |  | 110 |  |

|     |                                                                                     |     |                                                                                      |
|-----|-------------------------------------------------------------------------------------|-----|--------------------------------------------------------------------------------------|
| 111 | 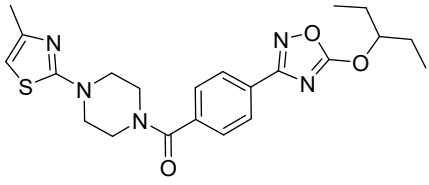   | 112 |    |
| 113 |    | 114 |    |
| 115 |    | 116 |    |
| 117 |   | 118 |   |
| 119 |  | 120 |  |
| 121 |  | 122 |  |
| 123 |  | 124 |  |
| 125 |  | 126 |  |



|     |                                                                                     |     |                                                                                      |
|-----|-------------------------------------------------------------------------------------|-----|--------------------------------------------------------------------------------------|
| 127 | 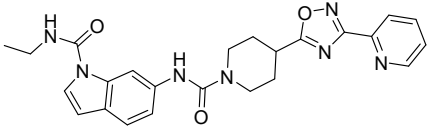   | 128 |    |
| 129 |    | 130 |    |
| 131 |    | 132 |    |
| 133 |    | 134 |    |
| 135 |   | 136 |   |
| 137 |  | 138 |  |
| 139 |  | 140 |  |
| 141 |  | 142 |  |
| 143 |  | 144 |  |
| 145 |  | 146 |  |



|     |  |     |  |
|-----|--|-----|--|
| 165 |  | 166 |  |
| 167 |  | 168 |  |
| 169 |  | 170 |  |
| 171 |  | 172 |  |
| 173 |  | 174 |  |
| 175 |  | 176 |  |
| 177 |  | 178 |  |
| 179 |  | 180 |  |
| 181 |  | 182 |  |

|     |  |     |  |
|-----|--|-----|--|
| 183 |  | 184 |  |
| 185 |  | 186 |  |
| 187 |  | 188 |  |
| 189 |  | 190 |  |
| 191 |  | 192 |  |
| 193 |  | 194 |  |
| 195 |  | 196 |  |
| 197 |  | 198 |  |

|     |                                                                                     |     |                                                                                      |
|-----|-------------------------------------------------------------------------------------|-----|--------------------------------------------------------------------------------------|
| 199 | 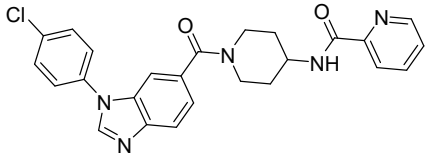   | 200 |    |
| 201 |    | 202 |    |
| 203 |    | 204 |    |
| 205 |    | 206 |    |
| 207 |   | 208 |   |
| 209 |  | 210 |  |
| 211 |  | 212 |  |
| 213 |  | 214 |  |

|     |  |     |  |
|-----|--|-----|--|
| 215 |  | 216 |  |
| 217 |  | 218 |  |
| 219 |  | 220 |  |
| 221 |  | 222 |  |
| 223 |  | 224 |  |
| 225 |  | 226 |  |
| 227 |  | 228 |  |
| 229 |  | 230 |  |
| 231 |  | 232 |  |

|     |                                                                                     |     |                                                                                       |
|-----|-------------------------------------------------------------------------------------|-----|---------------------------------------------------------------------------------------|
| 233 | 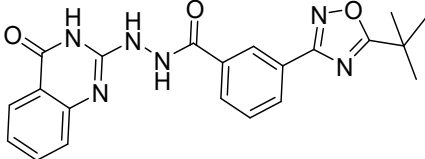   | 234 |     |
| 235 |    | 236 |     |
| 237 |    | 238 |     |
| 239 |    | 240 |     |
| 241 |   | 242 |    |
| 243 |  | 244 |   |
| 245 |  | 246 |  |
| 247 |  | 248 |  |

|     |                                                                                     |     |                                                                                       |
|-----|-------------------------------------------------------------------------------------|-----|---------------------------------------------------------------------------------------|
| 249 | 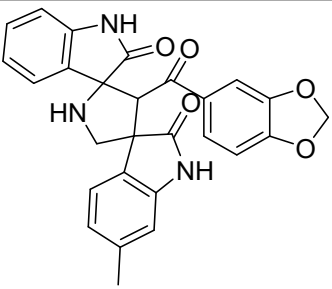   | 250 |    |
| 251 |    | 252 |    |
| 253 |   | 254 |   |
| 255 |  | 256 |  |
| 257 |  | 258 |  |
| 259 |  | 260 |  |



|     |                                                                                     |     |                                                                                      |
|-----|-------------------------------------------------------------------------------------|-----|--------------------------------------------------------------------------------------|
| 261 | 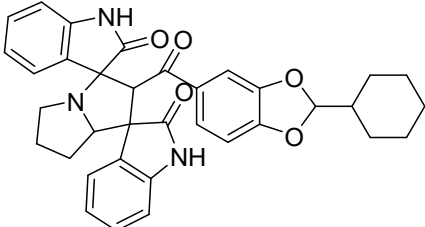   | 262 |    |
| 263 |    | 264 |    |
| 265 |    | 266 |    |
| 267 |   | 268 |   |
| 269 |  | 270 |  |
| 271 |  | 272 |  |

|     |                                                                                     |     |                                                                                      |
|-----|-------------------------------------------------------------------------------------|-----|--------------------------------------------------------------------------------------|
| 273 | 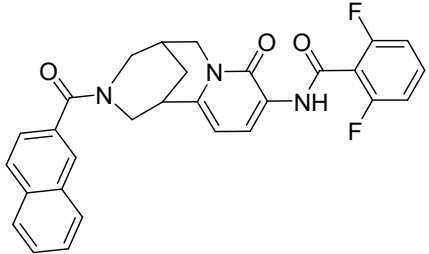   | 274 |    |
| 275 |    | 276 |    |
| 277 |    | 278 |    |
| 279 |  | 280 |  |
| 281 |  | 282 |  |
| 283 |  | 284 |  |

|     |                                                                                   |     |                                                                                    |
|-----|-----------------------------------------------------------------------------------|-----|------------------------------------------------------------------------------------|
| 285 | 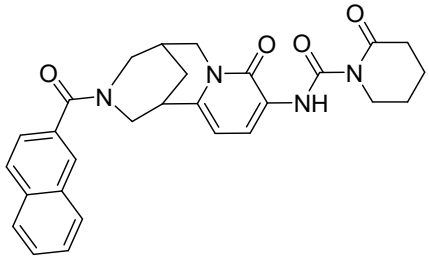 | 286 |  |
| 287 |  | 288 |  |

**Table S5.** The small molecules (228 compounds) obtained by the second round of molecular optimization.

| No. | Structure                                                                           | No. | Structure                                                                            |
|-----|-------------------------------------------------------------------------------------|-----|--------------------------------------------------------------------------------------|
| 1   | 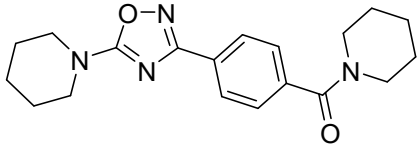  | 2   |   |
| 3   |  | 4   |  |
| 5   |  | 6   |  |
| 7   |  | 8   |  |
| 9   |  | 10  |  |
| 11  |  | 12  |  |

|    |                                                                                     |    |                                                                                      |
|----|-------------------------------------------------------------------------------------|----|--------------------------------------------------------------------------------------|
| 13 | 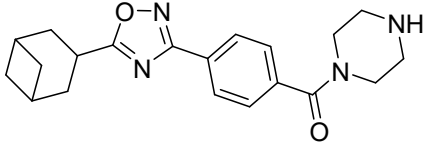   | 14 |   |
| 15 |    | 16 |    |
| 17 |    | 18 |   |
| 19 |    | 20 |    |
| 21 |   | 22 |   |
| 23 |  | 24 |  |
| 25 |  | 26 |  |
| 27 |  | 28 |  |
| 29 |  | 30 |  |

|    |  |    |  |
|----|--|----|--|
| 31 |  | 32 |  |
| 33 |  | 34 |  |
| 35 |  | 36 |  |
| 37 |  | 38 |  |
| 39 |  | 40 |  |
| 41 |  | 42 |  |
| 43 |  | 44 |  |
| 45 |  | 46 |  |
| 47 |  | 48 |  |
| 49 |  | 50 |  |

|    |  |    |  |
|----|--|----|--|
| 51 |  | 52 |  |
| 53 |  | 54 |  |
| 55 |  | 56 |  |
| 57 |  | 58 |  |
| 59 |  | 60 |  |
| 61 |  | 62 |  |
| 63 |  | 64 |  |
| 65 |  | 66 |  |
| 67 |  | 68 |  |
| 69 |  | 70 |  |

|    |                                                                                     |    |                                                                                      |
|----|-------------------------------------------------------------------------------------|----|--------------------------------------------------------------------------------------|
| 71 | 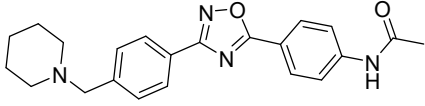   | 72 |   |
| 73 |    | 74 |    |
| 75 |    | 76 |   |
| 77 |    | 78 |    |
| 79 |    | 80 |   |
| 81 |  | 82 |  |
| 83 |  | 84 |  |
| 85 |  | 86 |  |
| 87 |  | 88 |  |

|     |  |     |  |
|-----|--|-----|--|
| 89  |  | 90  |  |
| 91  |  | 92  |  |
| 93  |  | 94  |  |
| 95  |  | 96  |  |
| 97  |  | 98  |  |
| 99  |  | 100 |  |
| 101 |  | 102 |  |
| 103 |  | 104 |  |
| 105 |  | 106 |  |
| 107 |  | 108 |  |



|     |  |     |  |
|-----|--|-----|--|
| 109 |  | 110 |  |
| 111 |  | 112 |  |
| 113 |  | 114 |  |
| 115 |  | 116 |  |
| 117 |  | 118 |  |
| 118 |  | 120 |  |
| 121 |  | 122 |  |
| 123 |  | 124 |  |
| 125 |  | 126 |  |
| 127 |  | 128 |  |

|     |                                                                                     |     |                                                                                      |
|-----|-------------------------------------------------------------------------------------|-----|--------------------------------------------------------------------------------------|
| 129 | 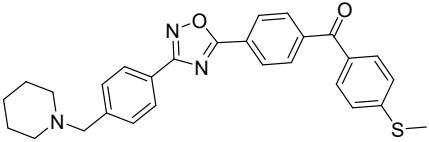   | 130 |    |
| 131 |    | 132 |    |
| 133 |    | 134 |    |
| 135 |    | 136 |    |
| 137 |   | 138 |   |
| 139 |  | 140 |  |
| 141 |  | 142 |  |
| 143 |  | 144 |  |
| 145 |  | 146 |  |
| 147 |  | 148 |  |

|     |  |     |  |
|-----|--|-----|--|
| 149 |  | 150 |  |
| 151 |  | 152 |  |
| 153 |  | 154 |  |
| 155 |  | 156 |  |
| 157 |  | 158 |  |
| 159 |  | 160 |  |
| 161 |  | 162 |  |
| 163 |  | 164 |  |
| 165 |  | 166 |  |
| 167 |  | 168 |  |

|     |  |     |  |
|-----|--|-----|--|
| 169 |  | 170 |  |
| 171 |  | 172 |  |
| 173 |  | 174 |  |
| 175 |  | 176 |  |
| 177 |  | 178 |  |
| 179 |  | 180 |  |
| 181 |  | 182 |  |
| 183 |  | 184 |  |
| 185 |  | 186 |  |
| 187 |  | 188 |  |

|     |  |     |  |
|-----|--|-----|--|
| 189 |  | 190 |  |
| 191 |  | 192 |  |
| 193 |  | 194 |  |
| 195 |  | 196 |  |
| 197 |  | 198 |  |
| 199 |  | 200 |  |
| 201 |  | 202 |  |
| 203 |  | 204 |  |
| 205 |  | 206 |  |
| 207 |  | 208 |  |

|     |  |     |  |
|-----|--|-----|--|
| 209 |  | 210 |  |
| 211 |  | 212 |  |
| 213 |  | 214 |  |
| 215 |  | 216 |  |
| 217 |  | 218 |  |
| 219 |  | 220 |  |
| 221 |  | 222 |  |
| 223 |  | 224 |  |
| 225 |  | 226 |  |
| 227 |  | 228 |  |

**Table S6.** The small molecules (141 compounds) obtained by the third round of molecular optimization.

| No. | Structure | No. | Structure |
|-----|-----------|-----|-----------|
| 1   |           | 2   |           |
| 3   |           | 4   |           |
| 5   |           | 6   |           |
| 7   |           | 8   |           |
| 9   |           | 10  |           |
| 11  |           | 12  |           |
| 13  |           | 14  |           |
| 15  |           | 16  |           |
| 17  |           | 18  |           |

|    |                                                                                     |    |                                                                                      |
|----|-------------------------------------------------------------------------------------|----|--------------------------------------------------------------------------------------|
| 19 | 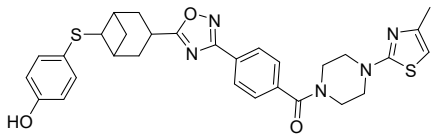   | 20 |    |
| 21 |    | 22 |    |
| 23 |    | 24 |    |
| 25 |    | 26 |    |
| 27 |   | 28 |   |
| 29 |  | 30 |  |
| 31 |  | 32 |  |
| 33 |  | 34 |  |
| 35 |  | 36 |  |
| 37 |  | 38 |  |



|    |  |    |  |
|----|--|----|--|
| 39 |  | 40 |  |
| 41 |  | 42 |  |
| 43 |  | 44 |  |
| 45 |  | 46 |  |
| 47 |  | 48 |  |
| 49 |  | 50 |  |
| 51 |  | 52 |  |
| 53 |  | 54 |  |
| 55 |  | 56 |  |
| 57 |  | 58 |  |

|    |                                                                                     |    |                                                                                      |
|----|-------------------------------------------------------------------------------------|----|--------------------------------------------------------------------------------------|
| 59 | 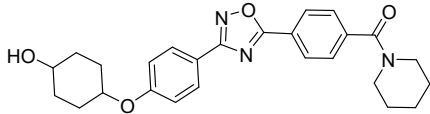   | 60 |    |
| 61 |    | 62 |    |
| 63 |    | 64 |    |
| 65 |    | 66 |    |
| 67 |   | 68 |   |
| 69 |  | 70 |  |
| 71 |  | 72 |  |
| 73 |  | 74 |  |
| 75 |  | 76 |  |
| 77 |  | 78 |  |

|    |  |    |  |
|----|--|----|--|
| 79 |  | 80 |  |
| 81 |  | 82 |  |
| 83 |  | 84 |  |
| 85 |  | 86 |  |
| 87 |  | 88 |  |
| 89 |  | 90 |  |
| 91 |  | 92 |  |
| 93 |  | 94 |  |
| 95 |  | 96 |  |

|     |  |     |  |
|-----|--|-----|--|
| 97  |  | 98  |  |
| 99  |  | 100 |  |
| 101 |  | 102 |  |
| 103 |  | 104 |  |
| 105 |  | 106 |  |
| 107 |  | 108 |  |
| 109 |  | 110 |  |
| 111 |  | 112 |  |
| 113 |  | 114 |  |
| 115 |  | 116 |  |

|     |  |     |  |
|-----|--|-----|--|
| 117 |  | 118 |  |
| 119 |  | 120 |  |
| 121 |  | 122 |  |
| 123 |  | 124 |  |
| 125 |  | 126 |  |
| 127 |  | 128 |  |
| 129 |  | 130 |  |
| 131 |  | 132 |  |
| 133 |  | 134 |  |

|     |                                                                                   |     |                                                                                    |
|-----|-----------------------------------------------------------------------------------|-----|------------------------------------------------------------------------------------|
| 135 | 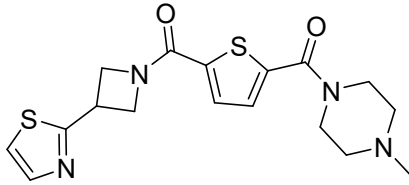 | 136 |  |
| 137 |  | 138 |  |
| 139 |  | 140 |  |
| 141 |  |     |                                                                                    |

### III. The structure and docking parameters of selected molecular from molecular optimization

**Table S7.** The structure and docking parameters of selected molecular from the first round of molecular optimization

| No. | Structure                                                                           | Total score | Crash   | Polar  |
|-----|-------------------------------------------------------------------------------------|-------------|---------|--------|
| 1   | 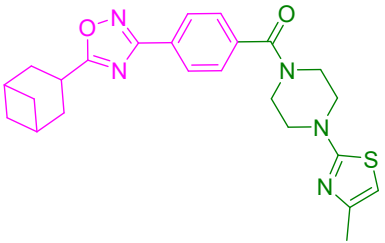 | 23.2464     | -2.3488 | 3.8897 |
| 2   |  | 22.0997     | -3.232  | 4.258  |

|   |                                                                                    |         |         |        |
|---|------------------------------------------------------------------------------------|---------|---------|--------|
| 3 | 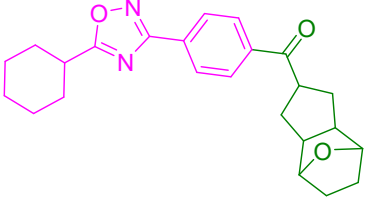  | 19.7138 | -2.5142 | 4.1784 |
| 4 |   | 20.5698 | -2.1063 | 4.0624 |
| 5 |  | 20.6115 | -2.2196 | 4.2344 |

**Table S8.** The structure and docking parameters of selected molecular from the second round of molecular optimization

| No. | Structure                                                                           | Total score | Crash   | Polar  |
|-----|-------------------------------------------------------------------------------------|-------------|---------|--------|
| 1   | 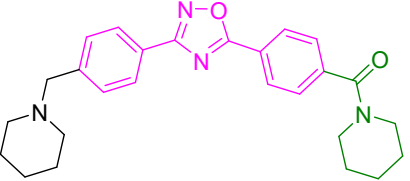 | 22.1532     | -2.3824 | 4.3589 |
| 2   |  | 22.7328     | -3.3721 | 4.1669 |
| 3   |  | 22.5528     | -2.5012 | 4.0969 |

|   |                                                                                   |         |         |        |
|---|-----------------------------------------------------------------------------------|---------|---------|--------|
| 4 | 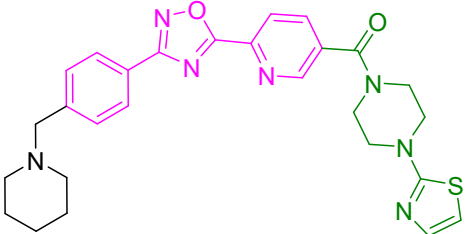 | 22.7051 | -2.678  | 4.3231 |
| 5 |  | 22.7455 | -3.5141 | 4.4952 |
| 6 |  | 23.0321 | -1.8343 | 4.3883 |

**Table S9.** The structure and docking parameters of selected molecular from the third round of molecular optimization

| No. | Structure                                                                           | Total score | Crash   | Polar  |
|-----|-------------------------------------------------------------------------------------|-------------|---------|--------|
| 1   | 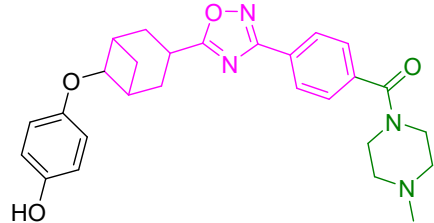 | 23.6081     | -2.6629 | 6.7003 |
| 2   |  | 23.0946     | -2.3597 | 6.0287 |
| 3   |  | 23.1046     | -2.9972 | 4.0831 |



|   |                                                                                    |         |         |        |
|---|------------------------------------------------------------------------------------|---------|---------|--------|
| 4 | 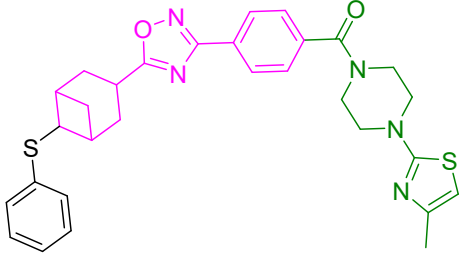  | 23.219  | -2.6492 | 3.5733 |
| 5 |   | 23.6945 | -3.0223 | 4.5986 |
| 6 |  | 23.0646 | -3.2628 | 4.0801 |

#### IV. Figures of Molecular Dynamics Simulation Studies

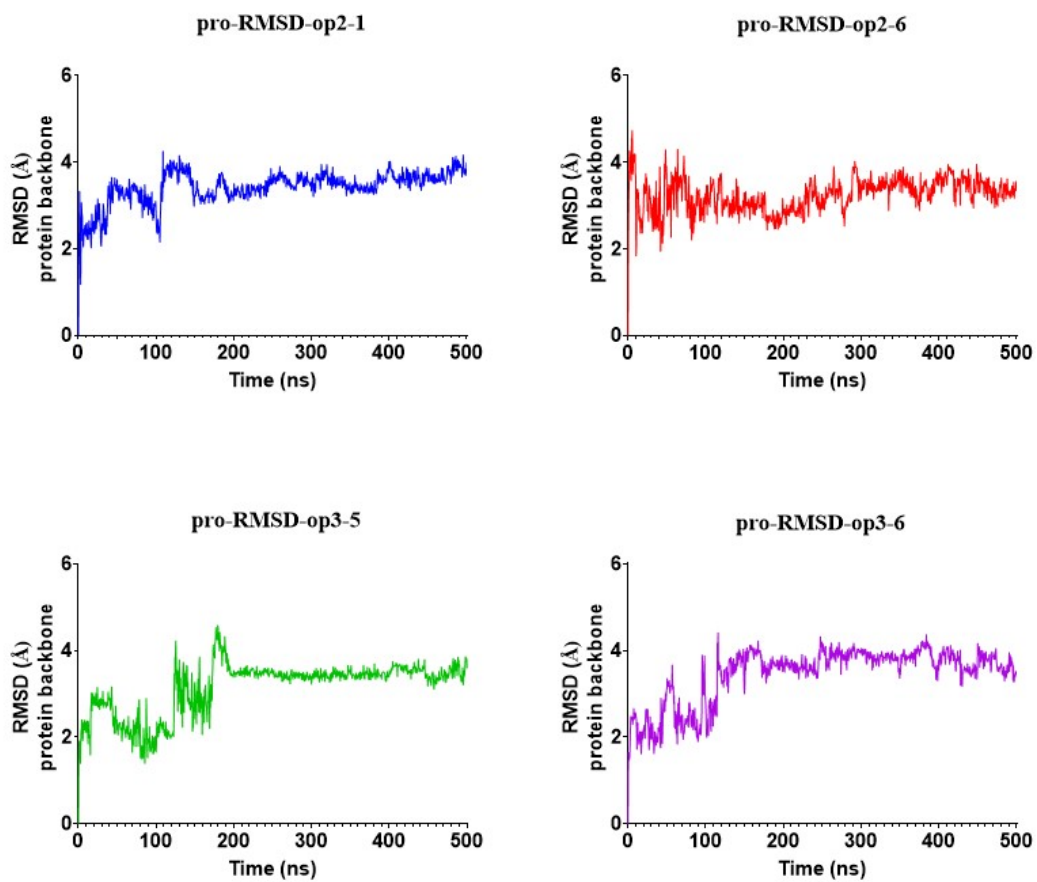

**Figure S1.** RMSD plot of protein backbone for protein-ligand complexes during 500 ns simulation.

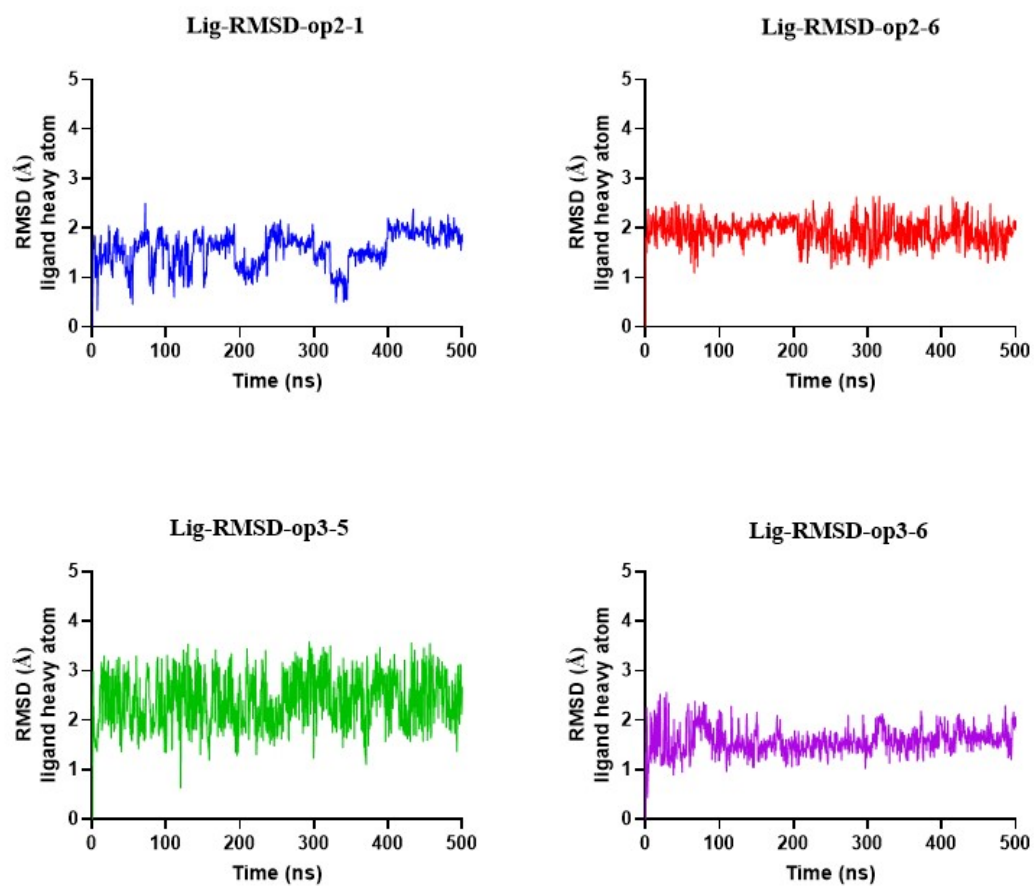

**Figure S2.** RMSD plot of ligand heavy atoms for protein-ligand complexes during 500 ns simulation.

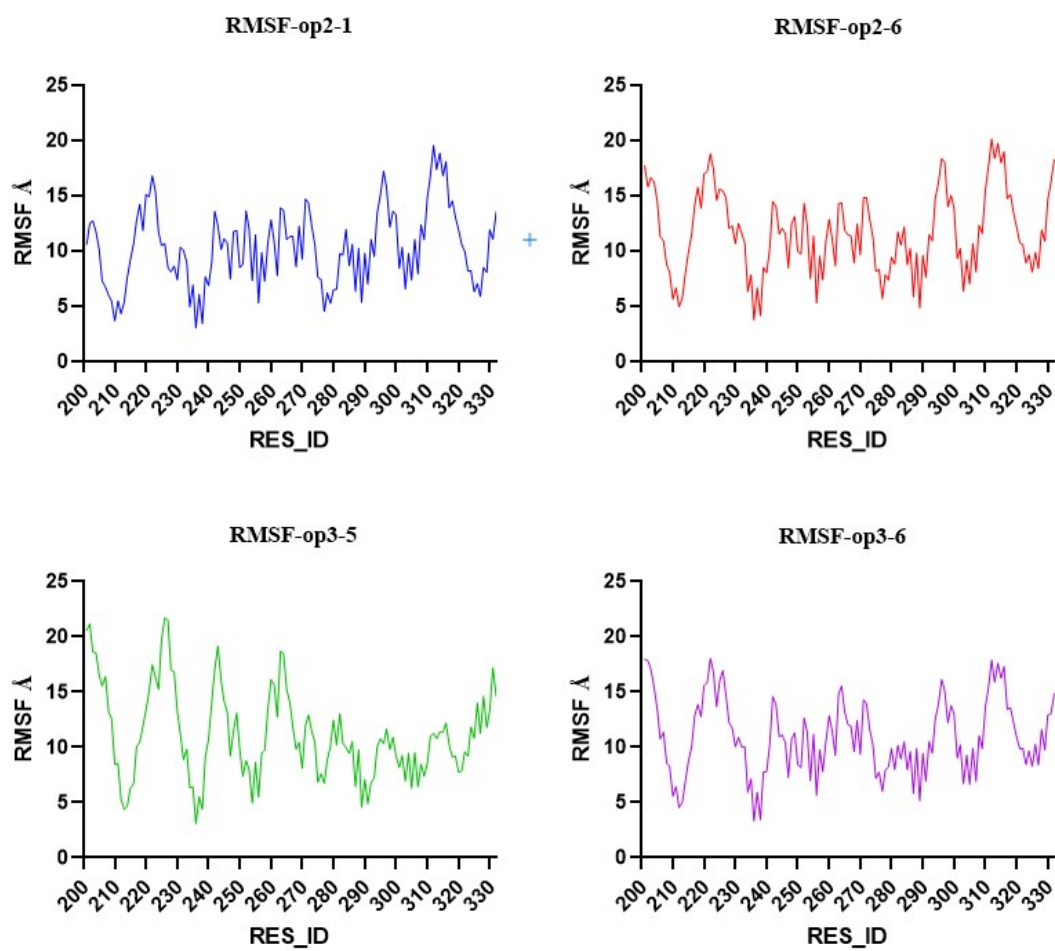

Figure S3. RMSF plot of protein-ligand complexes during 500 ns simulation.

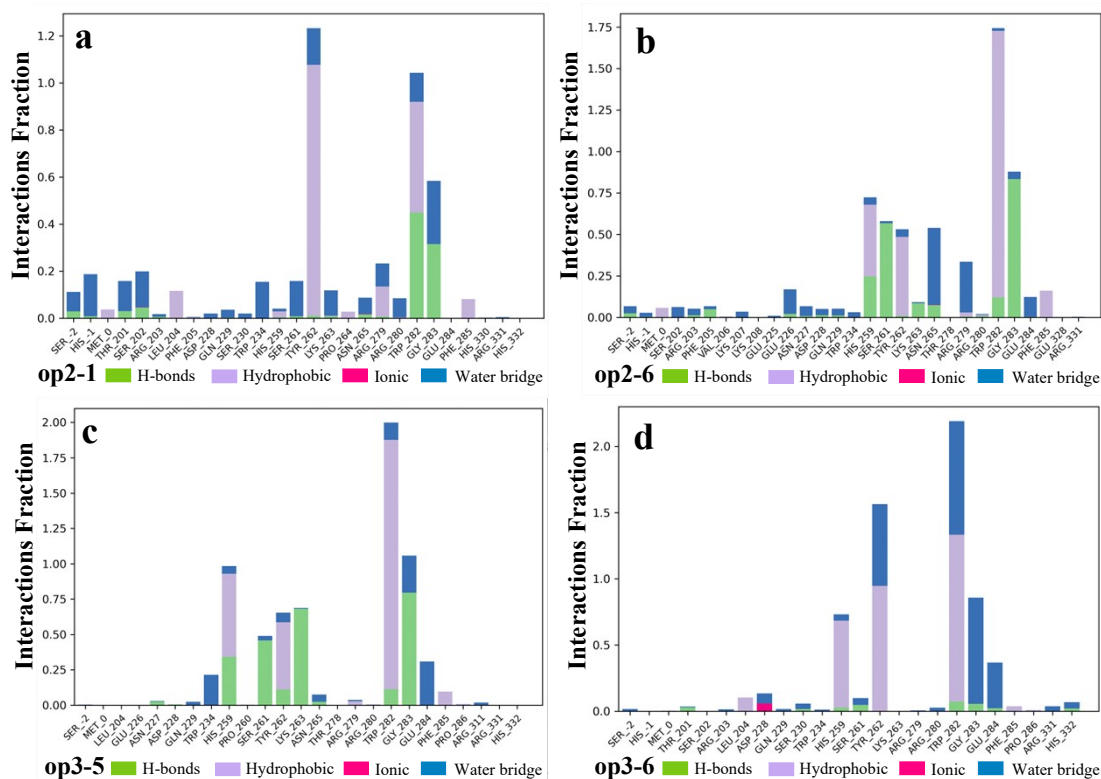

**Figure S4.** The stacked bar charts showing the protein–ligands interactions found during the 500 ns simulation run. The compounds **op2-1** (a), **op2-6** (b), **op3-5** (c), and **op3-6** (d) form multiple interactions with YEATS2 YEAST domain, mainly including hydrogen bonds, hydrophobic and water bridges. all the complex structures, it has been found to form multiple interactions including hydrogen bonds, hydrophobic, and water bridges. (a)The compound **op2-1** generated multiple interactions at Tyr262, Trp282 and Gly283. (b) The compound **op2-6** formed multiple interactions at His259, Ser261, Tyr262, Asn265, Trp282, and Gly283. (c) The compound **op3-5** formed multiple interactions at His259, Ser261, Tyr262, Lys263, Trp282, and Gly283. (d) The compound **op3-6** generated multiple interactions at His259, Tyr262, Trp282, and Gly283.

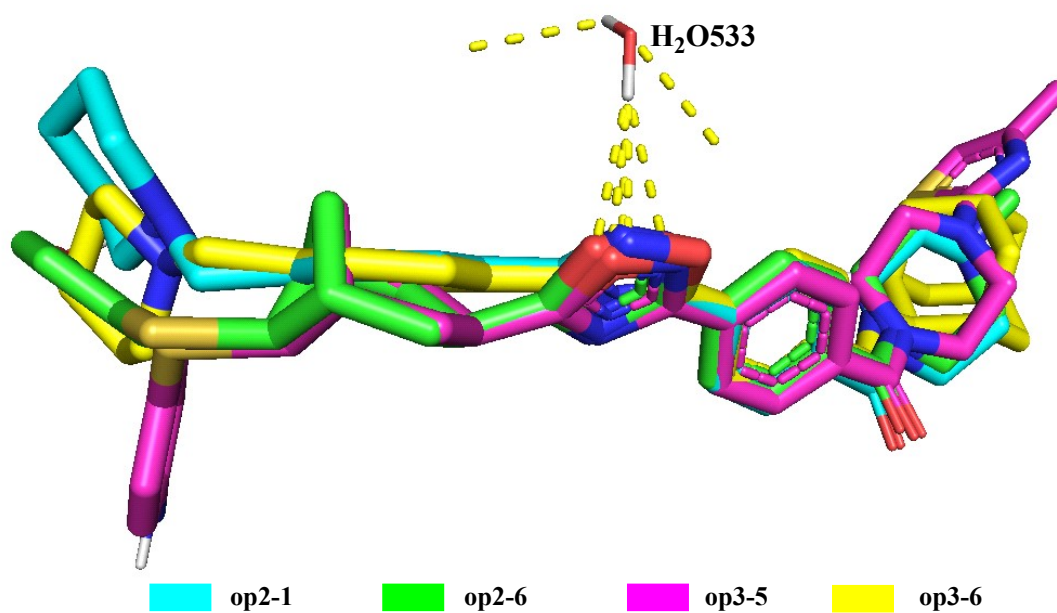

Supplement: d3nj03738j1.pdf [file d3nj03738j1.pdf]
